# Supplementary material for: A Comprehensive Computer Aided Vaccine Design Approach to Propose a Multi-Epitopes Subunit Vaccine against Genus Klebsiella Using Pan-Genomics, Reverse Vaccinology, and Biophysical Techniques
Source: MDPI journal article supplement (doi:10.3390/vaccines9101087), 2021-09-27
Supplement: s1 [file s1]

| population/area                 | Class combined        |                          |                   |
|---------------------------------|-----------------------|--------------------------|-------------------|
|                                 | coverage <sup>a</sup> | average_hit <sup>b</sup> | pc90 <sup>c</sup> |
| Algeria                         | 77.15%                | 6.96                     | 3.06              |
| Algeria Arab                    | 77.15%                | 6.96                     | 3.06              |
| American Samoa                  | 98.75%                | 14.16                    | 9.67              |
| American Samoa Polynesian       | 98.75%                | 14.16                    | 9.67              |
| Argentina                       | 99.07%                | 17.68                    | 11.57             |
| Argentina Amerindian            | 98.64%                | 15.91                    | 10.12             |
| Argentina Caucasoid             | 80.65%                | 7.52                     | 3.62              |
| Australia                       | 96.33%                | 15.34                    | 8.99              |
| Australia Australian Aborigines | 91.52%                | 12                       | 7.3               |
| Australia Caucasoid             | 99.94%                | 21.31                    | 16.49             |
| Austria                         | 99.99%                | 29.89                    | 23.29             |
| Austria Caucasoid               | 99.99%                | 29.89                    | 23.29             |
| Belarus                         | 43.81%                | 3.28                     | 1.25              |
| Belarus Caucasoid               | 43.81%                | 3.28                     | 1.25              |
| Belgium                         | 99.87%                | 22.8                     | 16.22             |
| Belgium Caucasoid               | 99.87%                | 22.8                     | 16.22             |
| Bolivia                         | 77.82%                | 6.51                     | 3.16              |
| Bolivia Amerindian              | 77.82%                | 6.51                     | 3.16              |
| Borneo                          | 49.02%                | 3.78                     | 1.37              |
| Borneo Austronesian             | 49.02%                | 3.78                     | 1.37              |
| Brazil                          | 98.59%                | 19.04                    | 12.17             |
| Brazil Amerindian               | 96.52%                | 13.22                    | 8.55              |
| Brazil Caucasoid                | 99.89%                | 25.33                    | 18.24             |
| Brazil Mixed                    | 99.33%                | 22.03                    | 14.96             |
| Brazil Mulatto                  | 74.09%                | 6.66                     | 2.7               |
| Bulgaria                        | 99.75%                | 21.26                    | 15.07             |
| Bulgaria Caucasoid              | 99.79%                | 21.49                    | 15.24             |
| Bulgaria Other                  | 99.58%                | 14.45                    | 10.05             |
| Burkina Faso                    | 67.18%                | 6.47                     | 2.13              |
| Burkina Faso Black              | 67.18%                | 6.47                     | 2.13              |
| Cameroon                        | 94.85%                | 15.63                    | 8.59              |
| Cameroon Black                  | 94.85%                | 15.63                    | 8.59              |
| Canada                          | 38.41%                | 2.95                     | 1.14              |
| Canada Amerindian               | 38.41%                | 2.95                     | 1.14              |
| Cape Verde                      | 99.84%                | 25.64                    | 18.29             |
| Cape Verde Black                | 99.84%                | 25.64                    | 18.29             |
| Central Africa                  | 94.79%                | 15.77                    | 8.59              |
| Central African Republic        | 87.54%                | 9.62                     | 5.62              |
| Central African Republic Black  | 87.54%                | 9.62                     | 5.62              |
| Central America                 | 53.80%                | 4.48                     | 1.52              |
| Chile                           | 98.66%                | 19.18                    | 12.36             |

|                          |         |       |       |
|--------------------------|---------|-------|-------|
| Chile Amerindian         | 99.90%  | 21.46 | 15.3  |
| Chile Mixed              | 95.31%  | 15.5  | 8.7   |
| China                    | 97.83%  | 17.65 | 10.56 |
| China Oriental           | 97.83%  | 17.65 | 10.56 |
| Colombia                 | 57.86%  | 4.98  | 1.66  |
| Colombia Amerindian      | 47.40%  | 3.71  | 1.33  |
| Colombia Black           | 66.51%  | 5.87  | 2.09  |
| Colombia Mestizo         | 62.45%  | 5.58  | 1.86  |
| Congo                    | 68.66%  | 5.93  | 2.23  |
| Congo Black              | 68.66%  | 5.93  | 2.23  |
| Cook Islands             | 78.59%  | 7.11  | 3.27  |
| Cook Islands Polynesian  | 78.59%  | 7.11  | 3.27  |
| Costa Rica               | 24.31%  | 1.78  | 0.92  |
| Costa Rica Mestizo       | 24.31%  | 1.78  | 0.92  |
| Croatia                  | 99.93%  | 24.28 | 17.34 |
| Croatia Caucasoid        | 99.93%  | 24.28 | 17.34 |
| Cuba                     | 99.84%  | 25.46 | 18.21 |
| Cuba Caucasoid           | 99.05%  | 17.32 | 12.16 |
| Cuba Mixed               | 85.48%  | 8.03  | 4.82  |
| Cuba Mulatto             | 98.74%  | 17.46 | 11.97 |
| Czech Republic           | 99.87%  | 25.84 | 18.64 |
| Czech Republic Caucasoid | 99.90%  | 26.3  | 19.34 |
| Czech Republic Other     | 64.14%  | 5.34  | 1.95  |
| Denmark                  | 88.98%  | 8.7   | 6.35  |
| Denmark Caucasoid        | 88.98%  | 8.7   | 6.35  |
| East Africa              | 97.08%  | 17.6  | 10.15 |
| East Asia                | 99.67%  | 23.36 | 16.07 |
| Ecuador                  | 89.16%  | 10.12 | 6.46  |
| Ecuador Amerindian       | 89.16%  | 10.12 | 6.46  |
| England                  | 100.00% | 30.89 | 24.31 |
| England Caucasoid        | 100.00% | 30.89 | 24.31 |
| Equatorial Guinea        | 47.58%  | 3.76  | 1.34  |
| Equatorial Guinea Black  | 47.58%  | 3.76  | 1.34  |
| Ethiopia                 | 83.00%  | 7.63  | 4.12  |
| Ethiopia Black           | 83.00%  | 7.63  | 4.12  |
| Europe                   | 99.96%  | 27.12 | 20.94 |
| Fiji                     | 79.87%  | 6.88  | 3.48  |
| Fiji Melanesian          | 79.87%  | 6.88  | 3.48  |
| Finland                  | 100.00% | 25.53 | 19.81 |
| Finland Caucasoid        | 100.00% | 25.53 | 19.81 |
| France                   | 99.98%  | 28.1  | 21.73 |
| France Caucasoid         | 99.98%  | 28.1  | 21.73 |
| Gabon                    | 41.78%  | 3.15  | 1.2   |

|                            |         |       |       |
|----------------------------|---------|-------|-------|
| Gabon Black                | 41.78%  | 3.15  | 1.2   |
| Georgia                    | 99.58%  | 22.46 | 15.47 |
| Georgia Caucasoid          | 99.74%  | 23.21 | 16.11 |
| Georgia Kurd               | 98.19%  | 15.61 | 10.2  |
| Germany                    | 99.99%  | 30    | 23.33 |
| Germany Caucasoid          | 99.99%  | 30    | 23.33 |
| Greece                     | 66.92%  | 5.76  | 2.12  |
| Greece Caucasoid           | 66.92%  | 5.76  | 2.12  |
| Guatemala                  | 53.11%  | 4.31  | 1.49  |
| Guatemala Amerindian       | 53.11%  | 4.31  | 1.49  |
| Guinea-Bissau              | 98.96%  | 21.1  | 14.25 |
| Guinea-Bissau Black        | 98.96%  | 21.1  | 14.25 |
| Hong Kong                  | 96.05%  | 13.36 | 8.48  |
| Hong Kong Oriental         | 96.05%  | 13.36 | 8.48  |
| India                      | 97.35%  | 17.74 | 10.41 |
| India Asian                | 97.35%  | 17.74 | 10.41 |
| Indonesia                  | 93.11%  | 13.99 | 7.82  |
| Indonesia Austronesian     | 93.11%  | 13.99 | 7.82  |
| Iran                       | 99.11%  | 20.74 | 14.21 |
| Iran Kurd                  | 55.78%  | 4.53  | 1.58  |
| Iran Persian               | 99.14%  | 20.9  | 14.31 |
| Ireland Northern           | 100.00% | 31.45 | 25.12 |
| Ireland Northern Caucasoid | 100.00% | 31.45 | 25.12 |
| Ireland South              | 100.00% | 30.67 | 24.15 |
| Ireland South Caucasoid    | 100.00% | 30.67 | 24.15 |
| Israel                     | 96.69%  | 16.82 | 9.67  |
| Israel Arab                | 98.19%  | 18.8  | 11.58 |
| Israel Jew                 | 98.10%  | 18.16 | 11.18 |
| Italy                      | 99.86%  | 25.24 | 18.28 |
| Italy Caucasoid            | 99.86%  | 25.24 | 18.28 |
| Ivory Coast                | 67.75%  | 5.63  | 2.17  |
| Ivory Coast Black          | 67.75%  | 5.63  | 2.17  |
| Jamaica                    | 27.41%  | 2.02  | 0.96  |
| Jamaica Black              | 27.41%  | 2.02  | 0.96  |
| Japan                      | 99.66%  | 22.67 | 15.61 |
| Japan Oriental             | 99.66%  | 22.67 | 15.61 |
| Jordan                     | 95.68%  | 15.21 | 8.78  |
| Jordan Arab                | 95.68%  | 15.21 | 8.78  |
| Kenya                      | 89.56%  | 11.29 | 6.7   |
| Kenya Black                | 89.56%  | 11.29 | 6.7   |
| Kiribati                   | 10.89%  | 0.77  | 0.79  |
| Kiribati Micronesian       | 10.89%  | 0.77  | 0.79  |
| Korea; South               | 99.74%  | 24.36 | 16.89 |

|                             |        |       |       |
|-----------------------------|--------|-------|-------|
| Korea; South Oriental       | 99.74% | 24.36 | 16.89 |
| Lebanon                     | 70.46% | 6.11  | 2.37  |
| Lebanon Arab                | 70.46% | 6.11  | 2.37  |
| Macedonia                   | 75.47% | 7.73  | 2.85  |
| Macedonia Caucasoid         | 75.47% | 7.73  | 2.85  |
| Malaysia                    | 92.18% | 13.45 | 7.54  |
| Malaysia Austronesian       | 83.57% | 10.42 | 4.26  |
| Malaysia Oriental           | 96.39% | 15.96 | 9.27  |
| Mali                        | 96.02% | 14.09 | 8.71  |
| Mali Black                  | 96.02% | 14.09 | 8.71  |
| Martinique                  | 80.26% | 8.3   | 3.55  |
| Martinique Black            | 80.26% | 8.3   | 3.55  |
| Mexico                      | 99.09% | 18.41 | 12.21 |
| Mexico Amerindian           | 99.93% | 18.81 | 14.24 |
| Mexico Mestizo              | 99.41% | 20.47 | 14.37 |
| Mongolia                    | 99.15% | 18.12 | 13.24 |
| Mongolia Oriental           | 99.15% | 18.12 | 13.24 |
| Morocco                     | 99.77% | 24.1  | 16.88 |
| Morocco Arab                | 99.90% | 25.51 | 18.59 |
| Morocco Caucasoid           | 99.58% | 22.67 | 15.63 |
| Nauru                       | 38.66% | 2.94  | 1.14  |
| Nauru Micronesian           | 38.66% | 2.94  | 1.14  |
| Netherlands                 | 83.44% | 7.97  | 4.23  |
| Netherlands Caucasoid       | 83.44% | 7.97  | 4.23  |
| New Caledonia               | 99.66% | 18.58 | 14.06 |
| New Caledonia Melanesian    | 99.66% | 18.58 | 14.06 |
| New Zealand                 | 84.46% | 7.98  | 4.5   |
| New Zealand Polynesian      | 84.46% | 7.98  | 4.5   |
| Niue                        | 77.82% | 6.66  | 3.16  |
| Niue Polynesian             | 77.82% | 6.66  | 3.16  |
| North Africa                | 99.01% | 20.66 | 14.15 |
| North America               | 99.89% | 25.87 | 18.77 |
| Northeast Asia              | 97.88% | 17.74 | 10.64 |
| Norway                      | 94.71% | 10.13 | 7.74  |
| Norway Caucasoid            | 94.71% | 10.13 | 7.74  |
| Oceania                     | 97.88% | 16.61 | 10.06 |
| Oman                        | 99.69% | 18.3  | 14.3  |
| Oman Arab                   | 99.69% | 18.3  | 14.3  |
| Pakistan                    | 97.13% | 11.22 | 8.44  |
| Pakistan Asian              | 96.79% | 11.13 | 8.34  |
| Pakistan Mixed              | 97.73% | 11.3  | 8.59  |
| Papua New Guinea            | 99.36% | 16.25 | 10.79 |
| Papua New Guinea Melanesian | 99.36% | 16.25 | 10.79 |

|                             |         |       |       |
|-----------------------------|---------|-------|-------|
| Paraguay                    | 4.90%   | 0.34  | 0.74  |
| Paraguay Amerindian         | 4.90%   | 0.34  | 0.74  |
| Peru                        | 100.00% | 17.59 | 12.52 |
| Peru Amerindian             | 100.00% | 17.59 | 12.52 |
| Philippines                 | 96.41%  | 13.13 | 8.4   |
| Philippines Austronesian    | 96.41%  | 13.13 | 8.4   |
| Poland                      | 99.96%  | 26.9  | 20.69 |
| Poland Caucasoid            | 99.96%  | 26.9  | 20.69 |
| Portugal                    | 99.72%  | 23.69 | 16.37 |
| Portugal Caucasoid          | 99.72%  | 23.69 | 16.37 |
| Romania                     | 99.67%  | 17.97 | 14.04 |
| Romania Caucasoid           | 99.67%  | 17.97 | 14.04 |
| Russia                      | 99.84%  | 23.91 | 16.76 |
| Russia Caucasoid            | 88.97%  | 9.13  | 6.35  |
| Russia Mixed                | 5.05%   | 0.35  | 0.74  |
| Russia Other                | 100.00% | 25.72 | 19.83 |
| Russia Siberian             | 99.88%  | 25.13 | 17.88 |
| Rwanda                      | 72.05%  | 7.1   | 2.5   |
| Rwanda Black                | 72.05%  | 7.1   | 2.5   |
| Samoa                       | 80.86%  | 7.42  | 3.66  |
| Samoa Polynesian            | 80.86%  | 7.42  | 3.66  |
| Sao Tome and Principe       | 99.00%  | 21.19 | 14.34 |
| Sao Tome and Principe Black | 99.00%  | 21.19 | 14.34 |
| Saudi Arabia                | 99.65%  | 22.75 | 15.82 |
| Saudi Arabia Arab           | 99.65%  | 22.75 | 15.82 |
| Scotland                    | 96.82%  | 15.31 | 9.21  |
| Scotland Caucasoid          | 96.82%  | 15.31 | 9.21  |
| Senegal                     | 96.92%  | 16.13 | 9.53  |
| Senegal Black               | 96.92%  | 16.13 | 9.53  |
| Serbia                      | 73.37%  | 6.52  | 2.63  |
| Serbia Caucasoid            | 73.37%  | 6.52  | 2.63  |
| Singapore                   | 97.49%  | 17.58 | 10.36 |
| Singapore Austronesian      | 96.77%  | 16.94 | 9.72  |
| Singapore Oriental          | 94.81%  | 12.86 | 8.1   |
| Slovakia                    | 18.28%  | 1.28  | 0.86  |
| Slovakia Caucasoid          | 18.28%  | 1.28  | 0.86  |
| Slovenia                    | 84.85%  | 8.16  | 4.62  |
| Slovenia Caucasoid          | 84.85%  | 8.16  | 4.62  |
| South Africa                | 95.27%  | 14.82 | 8.57  |
| South Africa Black          | 94.54%  | 14.54 | 8.3   |
| South Africa Other          | 97.61%  | 14.73 | 9.41  |
| South America               | 95.15%  | 15.07 | 8.58  |
| South Asia                  | 98.70%  | 19.46 | 12.86 |

|                            |         |       |       |
|----------------------------|---------|-------|-------|
| Southeast Asia             | 97.66%  | 17.31 | 10.29 |
| Southwest Asia             | 95.79%  | 15.53 | 8.88  |
| Spain                      | 97.57%  | 18.07 | 10.73 |
| Spain Caucasoid            | 97.61%  | 18.11 | 10.79 |
| Spain Other                | 6.30%   | 0.44  | 0.75  |
| Sri Lanka                  | 52.39%  | 4.16  | 1.47  |
| Sri Lanka Asian            | 52.39%  | 4.16  | 1.47  |
| Sudan                      | 97.55%  | 17.43 | 10.38 |
| Sudan Arab                 | 70.21%  | 6.47  | 2.35  |
| Sudan Black                | 2.19%   | 0.15  | 0.72  |
| Sudan Mixed                | 97.79%  | 17.87 | 10.74 |
| Sweden                     | 100.00% | 29.79 | 23.24 |
| Sweden Caucasoid           | 100.00% | 29.79 | 23.24 |
| Taiwan                     | 99.29%  | 20.37 | 14.21 |
| Taiwan Oriental            | 99.29%  | 20.37 | 14.21 |
| Thailand                   | 96.83%  | 16.93 | 9.73  |
| Thailand Oriental          | 96.83%  | 16.93 | 9.73  |
| Tokelau                    | 55.11%  | 4.24  | 1.56  |
| Tokelau Polynesian         | 55.11%  | 4.24  | 1.56  |
| Tonga                      | 71.91%  | 6.16  | 2.49  |
| Tonga Polynesian           | 71.91%  | 6.16  | 2.49  |
| Tunisia                    | 99.36%  | 20.76 | 14.54 |
| Tunisia Arab               | 99.38%  | 20.85 | 14.6  |
| Tunisia Berber             | 74.47%  | 6.6   | 2.74  |
| Turkey                     | 86.85%  | 10.04 | 5.32  |
| Turkey Caucasoid           | 86.85%  | 10.04 | 5.32  |
| Uganda                     | 94.87%  | 13.76 | 8.3   |
| Uganda Black               | 94.87%  | 13.76 | 8.3   |
| Ukraine                    | 50.64%  | 3.84  | 1.42  |
| Ukraine Caucasoid          | 50.64%  | 3.84  | 1.42  |
| United Arab Emirates       | 35.19%  | 2.54  | 1.08  |
| United Arab Emirates Arab  | 35.19%  | 2.54  | 1.08  |
| United States              | 99.89%  | 26.03 | 18.99 |
| United States Amerindian   | 99.81%  | 19.31 | 14.13 |
| United States Asian        | 99.46%  | 22.41 | 15.27 |
| United States Austronesian | 58.09%  | 4.8   | 1.67  |
| United States Black        | 99.18%  | 21.74 | 14.67 |
| United States Caucasoid    | 99.98%  | 29.12 | 22.47 |
| United States Hispanic     | 99.71%  | 22.85 | 15.84 |
| United States Mestizo      | 99.79%  | 22.98 | 16.05 |
| United States Polynesian   | 99.88%  | 23.67 | 16.68 |
| Venezuela                  | 90.34%  | 9.48  | 7.05  |
| Venezuela Amerindian       | 90.07%  | 9.17  | 7.01  |

|                           |              |              |             |
|---------------------------|--------------|--------------|-------------|
| Venezuela Caucasoid       | 11.45%       | 0.81         | 0.79        |
| Venezuela Mestizo         | 9.75%        | 0.69         | 0.78        |
| Venezuela Mixed           | 3.17%        | 0.22         | 0.72        |
| Vietnam                   | 96.27%       | 16.08        | 9.19        |
| Vietnam Oriental          | 96.27%       | 16.08        | 9.19        |
| Wales                     | 1.00%        | 0.07         | 0.71        |
| Wales Caucasoid           | 1.00%        | 0.07         | 0.71        |
| West Africa               | 98.43%       | 19.67        | 12.42       |
| West Indies               | 99.69%       | 23.55        | 16.2        |
| Zambia                    | 98.10%       | 14.99        | 9.71        |
| Zambia Black              | 98.10%       | 14.99        | 9.71        |
| Zimbabwe                  | 98.03%       | 18.54        | 11.29       |
| Zimbabwe Black            | 98.03%       | 18.54        | 11.29       |
| <b>Average</b>            | <b>82.86</b> | <b>14.22</b> | <b>9.35</b> |
| <b>Standard deviation</b> | <b>25.28</b> | <b>8.36</b>  | <b>6.64</b> |
