# Supplementary material for: A Comprehensive Computer Aided Vaccine Design Approach to Propose a Multi-Epitopes Subunit Vaccine against Genus Klebsiella Using Pan-Genomics, Reverse Vaccinology, and Biophysical Techniques
Source: MDPI journal article supplement (doi:10.3390/vaccines9101087), 2021-09-27
Supplement: s1 [file s1]

**TLR4****Patchdock**

| <b>Solution No</b> | <b>Score</b> | <b>Area</b> | <b>ACE</b> | <b>Transformation</b>                | <b>PDB file of the complex</b> |
|--------------------|--------------|-------------|------------|--------------------------------------|--------------------------------|
| 1                  | 17636        | 2196.4      | 411.82     | -2.73 1.41 -0.52 5.57 40.16 -36.28   | result.1.pdb                   |
| 2                  | 17056        | 2719.9      | 435.53     | -1.74 0.96 0.85 -29.72 -24.55 -11.11 | result.2.pdb                   |
| 3                  | 16948        | 2248.6      | 426.91     | -1.70 -0.24 -1.73 -13.03 24.85 19.06 | result.3.pdb                   |
| 4                  | 16764        | 2566.6      | 401.38     | 1.22 -0.13 -1.80 18.23 23.27 5.55    | result.4.pdb                   |
| 5                  | 16738        | 2254        | 420.99     | 0.77 0.59 3.08 55.35 7.69 -10.55     | result.5.pdb                   |
| 6                  | 16400        | 2411.7      | 322.35     | 1.16 -0.01 -1.73 16.63 25.77 3.23    | result.6.pdb                   |
| 7                  | 16154        | 2372.7      | 404.89     | -1.70 0.44 -2.89 44.20 32.76 30.39   | result.7.pdb                   |
| 8                  | 16010        | 2056        | 382.30     | 2.44 -1.04 -1.55 63.19 10.64 5.20    | result.8.pdb                   |
| 9                  | 15904        | 2199        | 153.84     | -0.24 0.99 2.11 24.66 8.70 -37.95    | result.9.pdb                   |
| 10                 | 15732        | 1841.1      | 439.44     | 2.18 1.02 2.53 4.49 -0.59 -2.76      | result.10.pdb                  |
| 11                 | 15724        | 2037.4      | 430.96     | -3.11 0.58 0.34 -20.17 20.72 10.91   | result.11.pdb                  |
| 12                 | 15572        | 2365.7      | 463.65     | -1.94 0.82 -2.83 60.47 16.42 -17.14  | result.12.pdb                  |
| 13                 | 15396        | 2543.1      | 350.02     | 1.57 -0.39 -1.25 -21.69 74.80 2.73   | result.13.pdb                  |
| 14                 | 15372        | 2357        | 93.27      | 3.09 0.16 -1.23 -34.79 60.06 0.76    | result.14.pdb                  |
| 15                 | 15370        | 2153.8      | 474.70     | -2.34 1.33 -1.94 33.31 29.30 -29.46  | result.15.pdb                  |
| 16                 | 15290        | 2401.1      | 223.96     | 0.52 0.47 1.75 8.21 -13.23 -39.78    | result.16.pdb                  |
| 17                 | 15170        | 2538.2      | 318.13     | 0.99 -0.87 2.66 50.86 -0.15 27.84    | result.17.pdb                  |
| 18                 | 15168        | 1946.8      | 487.29     | -0.70 0.60 -1.42 22.41 49.31 -18.73  | result.18.pdb                  |
| 19                 | 15144        | 2448.8      | 359.85     | 0.80 -0.36 1.40 -2.73 2.63 7.14      | result.19.pdb                  |
| 20                 | 15112        | 2353.3      | 175.01     | 2.59 -0.07 2.82 -0.51 6.25 19.81     | result.20.pdb                  |
