# Supplementary material for: A Comprehensive Computer Aided Vaccine Design Approach to Propose a Multi-Epitopes Subunit Vaccine against Genus Klebsiella Using Pan-Genomics, Reverse Vaccinology, and Biophysical Techniques
Source: MDPI journal article supplement (doi:10.3390/vaccines9101087), 2021-09-27
Supplement: s1 [file s1]

# MHC-I

| Solution No | Score | Area   | ACE    | Transformation                           | PDB file of the complex |
|-------------|-------|--------|--------|------------------------------------------|-------------------------|
| 1           | 23626 | 3494.3 | 218.20 | -0.21 0.73 1.85 21.24 -<br>0.15 -38.99   | result.1.pdb            |
| 2           | 18068 | 2967.1 | 188.91 | -0.16 0.64 1.87 18.25<br>1.60 -39.95     | result.2.pdb            |
| 3           | 17022 | 3179.6 | 358.75 | 1.79 -0.26 -1.04 -25.49<br>49.54 -25.39  | result.3.pdb            |
| 4           | 16872 | 2745.3 | 232.04 | 2.43 0.03 -0.72 18.16<br>11.54 -13.99    | result.4.pdb            |
| 5           | 16764 | 2410.1 | -82.23 | 0.06 0.39 0.44 -18.44 -<br>41.19 -37.56  | result.5.pdb            |
| 6           | 16744 | 3259.5 | 378.20 | -2.48 0.06 1.84 23.64 -<br>11.33 -5.88   | result.6.pdb            |
| 7           | 16534 | 2248.6 | 423.40 | -1.01 0.90 -2.71 43.33<br>30.82 -39.70   | result.7.pdb            |
| 8           | 16302 | 2436.8 | 399.72 | -0.99 0.67 -2.88 55.08<br>24.40 -28.05   | result.8.pdb            |
| 9           | 16250 | 2603.7 | 138.07 | 2.25 -0.32 -0.37 7.39<br>12.04 -15.56    | result.9.pdb            |
| 10          | 16220 | 2520.2 | -17.52 | 0.32 -0.16 0.73 -21.18 -<br>44.83 -21.00 | result.10.pdb           |
| 11          | 16198 | 2450.4 | 130.98 | -1.95 1.06 -1.57 7.24<br>44.59 -43.49    | result.11.pdb           |
| 12          | 16184 | 2497.9 | 141.54 | 0.14 0.87 1.61 12.56<br>3.77 -44.99      | result.12.pdb           |
| 13          | 16166 | 3185.1 | 411.76 | 0.16 -0.61 0.20 -1.25 -<br>3.72 -31.04   | result.13.pdb           |
| 14          | 16148 | 2169.1 | 405.36 | 1.95 -0.53 -1.58 1.96<br>39.97 9.49      | result.14.pdb           |
| 15          | 16008 | 2345.3 | -72.45 | 0.62 -0.33 0.73 -26.25 -<br>44.89 -18.87 | result.15.pdb           |
| 16          | 15876 | 2435.1 | 498.39 | 2.75 -0.22 1.22 -29.11 -<br>55.53 -32.27 | result.16.pdb           |
| 17          | 15804 | 2113.1 | 489.02 | 1.82 -0.27 -2.97 26.82 -<br>1.04 -34.50  | result.17.pdb           |
| 18          | 15718 | 2314.5 | 180.05 | -1.55 1.06 -2.06 22.59<br>40.58 -44.13   | result.18.pdb           |
| 19          | 15608 | 2305.2 | 333.41 | 2.40 0.25 -1.02 -2.97<br>45.11 -52.97    | result.19.pdb           |
| 20          | 15580 | 2174.1 | 15.03  | 2.09 0.10 -0.75 -27.78<br>35.56 -46.75   | result.20.pdb           |
