# Supplementary material for: A Comprehensive Computer Aided Vaccine Design Approach to Propose a Multi-Epitopes Subunit Vaccine against Genus Klebsiella Using Pan-Genomics, Reverse Vaccinology, and Biophysical Techniques
Source: MDPI journal article supplement (doi:10.3390/vaccines9101087), 2021-09-27
Supplement: s1 [file s1]

| <b>SPECIES</b>           | <b>REPORTED</b> | <b>Complete Sequenced</b> |
|--------------------------|-----------------|---------------------------|
| <i>K. aerogenes</i>      | 363             | 32                        |
| <i>K. oxytoca</i>        | 222             | 32                        |
| <i>K. michiganensis</i>  | 296             | 27                        |
| <i>K. pneumoniae</i>     | 11143           | 764                       |
| <i>K. quasipneumonia</i> | 646             | 55                        |
| <i>K. grimontii</i>      | 110             | 15                        |
| <i>K. variicola</i>      | 495             | 48                        |
