# Supplementary material for: A Comprehensive Computer Aided Vaccine Design Approach to Propose a Multi-Epitopes Subunit Vaccine against Genus Klebsiella Using Pan-Genomics, Reverse Vaccinology, and Biophysical Techniques
Source: MDPI journal article supplement (doi:10.3390/vaccines9101087), 2021-09-27
Supplement: s1 [file s1]

# MHC-II

| Solution No | Score | Area   | ACE         | Transformation                           | PDB file of the complex |
|-------------|-------|--------|-------------|------------------------------------------|-------------------------|
| 1           | 17500 | 2213.1 | 92.40       | 0.93 -0.60 0.53 -51.27 -<br>40.87 -4.29  | result.1.pdb            |
| 2           | 17352 | 2490.7 | -<br>163.68 | 0.36 0.12 -1.13 11.77 -<br>4.65 -11.55   | result.2.pdb            |
| 3           | 17290 | 2791   | -<br>297.23 | 0.22 0.28 -1.23 9.19 -<br>10.50 -12.28   | result.3.pdb            |
| 4           | 17236 | 2287.9 | 407.96      | 0.34 0.49 -1.32 -17.86<br>31.95 -26.21   | result.4.pdb            |
| 5           | 16498 | 2338.4 | -22.50      | -1.00 -0.27 2.49 0.38 -<br>5.34 -9.78    | result.5.pdb            |
| 6           | 16122 | 2393.3 | 187.16      | -0.58 0.55 3.12 27.45<br>19.01 -22.11    | result.6.pdb            |
| 7           | 15900 | 2108.1 | 105.34      | 0.17 1.41 -1.58 -47.37 -<br>1.78 -47.67  | result.7.pdb            |
| 8           | 15856 | 1997.4 | 196.65      | -0.83 -0.59 0.34 -16.35 -<br>10.85 52.61 | result.8.pdb            |
| 9           | 15734 | 1973.9 | -10.49      | -1.79 0.40 -2.26 -21.31<br>18.18 -13.51  | result.9.pdb            |
| 10          | 15682 | 2702.1 | 8.48        | -3.02 0.33 1.09 6.00 -<br>12.13 17.26    | result.10.pdb           |
| 11          | 15646 | 2500.4 | 70.11       | -0.15 0.66 1.98 19.18 -<br>27.07 -29.93  | result.11.pdb           |
| 12          | 15628 | 2294.7 | 113.58      | 1.26 -0.77 0.75 -17.44 -<br>33.66 14.68  | result.12.pdb           |
| 13          | 15626 | 2864.6 | 107.42      | -1.75 -1.10 2.73 2.50<br>1.57 -3.23      | result.13.pdb           |
| 14          | 15550 | 2253.8 | 430.24      | 0.41 0.28 -1.24 -20.24<br>5.54 -37.06    | result.14.pdb           |
| 15          | 15382 | 2393.2 | -94.82      | 2.76 0.15 0.94 0.06 -<br>6.12 14.51      | result.15.pdb           |
| 16          | 15112 | 2036.4 | 11.61       | -0.90 -0.87 3.12 16.01 -<br>1.70 23.94   | result.16.pdb           |
| 17          | 15044 | 1831.4 | 204.53      | 1.11 -0.63 0.78 -46.08 -<br>46.93 -2.79  | result.17.pdb           |
| 18          | 15012 | 2205.4 | -<br>161.73 | -1.87 0.66 -2.35 -18.17<br>15.50 -11.90  | result.18.pdb           |
| 19          | 14944 | 2233.7 | -66.64      | 3.10 -0.16 -1.71 9.70<br>44.03 -3.16     | result.19.pdb           |
| 20          | 14904 | 2448.2 | 198.30      | -0.25 -0.24 -0.98 -34.50<br>4.37 -20.47  | result.20.pdb           |
